# Supplementary material for: Single-pollen-cell sequencing for gamete-based phased diploid genome assembly in plants
Source: Genome Res. 2019 Nov;29(11):1889–99. doi: 10.1101/gr.251033.119 (PMC6836740; doi:10.1101/gr.251033.119)
Supplement: Supplemental Material [file supp_gr.251033.119_Supplemental_Table_S10.xlsx]

## Sheet: Phased
Supplemental_Table_S10 the depth of coverage on Phased and Unphased BACs
BAC ID	BAC length	the average depth of coverage
scaffold_PAIajnDLiB1-4-16-3PIAAPEJ_108_209.depth	180312	250.081
scaffold_PAIajnDLiB1-4-16-3PIAAPEJ_108_224.depth	171307	96.7208
scaffold_PAIajnDLiB1-4-16-3PIAAPEJ_108_285.depth	163737	27.5912
scaffold_PAIajnDLiB1-4-16-3PIAAPEJ_108_260.depth	161512	158.592
scaffold_PAIajnDLiB1-4-16-3PIAAPEJ_108_109.depth	160942	69.2058
scaffold_PAIajnDLiB1-4-16-3PIAAPEJ_108_206.depth	160796	1028.73
scaffold_PAIajnDLiB1-4-16-3PIAAPEJ_108_194.depth	157627	456.509
scaffold_PAIajnDLiB1-4-16-3PIAAPEJ_108_201.depth	156650	114.693
scaffold_PAIajnDLiB1-4-16-3PIAAPEJ_108_255.depth	153074	23.4821
scaffold_PAIajnDLiB1-4-16-3PIAAPEJ_108_245.depth	152494	37.8831
scaffold_PAIajnDLiB1-4-16-3PIAAPEJ_108_247.depth	147621	28.2687
scaffold_PAIajnDLiB1-4-16-3PIAAPEJ_108_218.depth	147324	154.347
scaffold_PAIajnDLiB1-4-16-3PIAAPEJ_108_254.depth	146577	385.672
scaffold_PAIajnDLiB1-4-16-3PIAAPEJ_108_249.depth	144015	101.001
scaffold_PAIajnDLiB1-4-16-3PIAAPEJ_108_246.depth	142101	37.5049
scaffold_PAIajnDLiB1-4-16-3PIAAPEJ_108_288.depth	136115	477.971
scaffold_PAIajnDLiB1-4-16-3PIAAPEJ_108_84.depth	135654	415.731
scaffold_PAIajnDLiB1-4-16-3PIAAPEJ_108_250.depth	134884	233.723
scaffold_PAIajnDLiB1-4-16-3PIAAPEJ_108_214.depth	134256	66.9946
scaffold_PAIajnDLiB1-4-16-3PIAAPEJ_108_103.depth	134078	278.445
scaffold_PAIajnDLiB1-4-16-3PIAAPEJ_108_198.depth	133333	50.2465
scaffold_PAIajnDLiB1-4-16-3PIAAPEJ_108_276.depth	132340	39.4001
scaffold_PAIajnDLiB1-4-16-3PIAAPEJ_108_238.depth	131696	34.0352
scaffold_PAIajnDLiB1-4-16-3PIAAPEJ_108_243.depth	129465	26.8839
scaffold_PAIajnDLiB1-4-16-3PIAAPEJ_108_196.depth	128324	482.456
scaffold_PAIajnDLiB1-4-16-3PIAAPEJ_108_230.depth	124989	365.854
scaffold_PAIajnDLiB1-4-16-3PIAAPEJ_108_261.depth	123847	79.5815
scaffold_PAIajnDLiB1-4-16-3PIAAPEJ_108_81.depth	122382	24.7992
scaffold_PAIajnDLiB1-4-16-3PIAAPEJ_108_143.depth	122035	407.493
scaffold_PAIajnDLiB1-4-16-3PIAAPEJ_108_278.depth	121807	43.1811
scaffold_PAIajnDLiB1-4-16-3PIAAPEJ_108_104.depth	121425	20.1366
scaffold_PAIajnDLiB1-4-16-3PIAAPEJ_108_204.depth	121197	259.116
scaffold_PAIajnDLiB1-4-16-3PIAAPEJ_108_237.depth	120926	113.879
scaffold_PAIajnDLiB1-4-16-3PIAAPEJ_108_211.depth	120864	400.873
scaffold_PAIajnDLiB1-4-16-3PIAAPEJ_108_193.depth	119757	78.2937
scaffold_PAIajnDLiB1-4-16-3PIAAPEJ_108_202.depth	119527	35.7862
scaffold_PAIajnDLiB1-4-16-3PIAAPEJ_108_225.depth	119328	315.789
scaffold_PAIajnDLiB1-4-16-3PIAAPEJ_109_100.depth	118365	26.658
scaffold_PAIajnDLiB1-4-16-3PIAAPEJ_108_98.depth	117286	27.0258
scaffold_PAIajnDLiB1-4-16-3PIAAPEJ_108_134.depth	117167	52.1089
scaffold_PAIajnDLiB1-4-16-3PIAAPEJ_108_152.depth	117105	187.608
scaffold_PAIajnDLiB1-4-16-3PIAAPEJ_108_257.depth	116297	97.8437
scaffold_PAIajnDLiB1-4-16-3PIAAPEJ_108_217.depth	115932	549.025
scaffold_PAIajnDLiB1-4-16-3PIAAPEJ_108_148.depth	114946	342.763
scaffold_PAIajnDLiB1-4-16-3PIAAPEJ_108_119.depth	114929	36.2872
scaffold_PAIajnDLiB1-4-16-3PIAAPEJ_108_101.depth	113514	78.5387
scaffold_PAIajnDLiB1-4-16-3PIAAPEJ_108_223.depth	111303	69.8193
scaffold_PAIajnDLiB1-4-16-3PIAAPEJ_108_170.depth	110696	21.7829
scaffold_PAIajnDLiB1-4-16-3PIAAPEJ_108_94.depth	110644	30.9468
scaffold_PAIajnDLiB1-4-16-3PIAAPEJ_108_114.depth	110103	482.544
scaffold_PAIajnDLiB1-4-16-3PIAAPEJ_108_95.depth	109814	99.1675
scaffold_PAIajnDLiB1-4-16-3PIAAPEJ_108_267.depth	109753	33.4038
scaffold_PAIajnDLiB1-4-16-3PIAAPEJ_108_17.depth	107837	26.0179
scaffold_PAIajnDLiB1-4-16-3PIAAPEJ_108_253.depth	107786	1855.53
scaffold_PAIajnDLiB1-4-16-3PIAAPEJ_108_26.depth	107501	22.1945
scaffold_PAIajnDLiB1-4-16-3PIAAPEJ_108_128.depth	107412	449.737
scaffold_PAIajnDLiB1-4-16-3PIAAPEJ_108_142.depth	106439	228.488
scaffold_PAIajnDLiB1-4-16-3PIAAPEJ_108_99.depth	105692	36.0113
scaffold_PAIajnDLiB1-4-16-3PIAAPEJ_108_80.depth	105156	284.381
scaffold_PAIajnDLiB1-4-16-3PIAAPEJ_108_9.depth	105134	158.379
scaffold_PAIajnDLiB1-4-16-3PIAAPEJ_108_241.depth	104875	21.6574
scaffold_PAIajnDLiB1-4-16-3PIAAPEJ_108_203.depth	104740	124.636
scaffold_PAIajnDLiB1-4-16-3PIAAPEJ_108_7.depth	104619	202.193
scaffold_PAIajnDLiB1-4-16-3PIAAPEJ_108_270.depth	103869	352.539
scaffold_PAIajnDLiB1-4-16-3PIAAPEJ_108_145.depth	103850	40.623
scaffold_PAIajnDLiB1-4-16-3PIAAPEJ_108_91.depth	103476	56.0834
scaffold_PAIajnDLiB1-4-16-3PIAAPEJ_108_92.depth	103251	23.8781
scaffold_PAIajnDLiB1-4-16-3PIAAPEJ_108_82.depth	103162	950.197
scaffold_PAIajnDLiB1-4-16-3PIAAPEJ_108_16.depth	103061	22.7639
scaffold_PAIajnDLiB1-4-16-3PIAAPEJ_108_157.depth	102890	71.2884
scaffold_PAIajnDLiB1-4-16-3PIAAPEJ_108_132.depth	102882	657.849
scaffold_PAIajnDLiB1-4-16-3PIAAPEJ_108_280.depth	102626	150.201
scaffold_PAIajnDLiB1-4-16-3PIAAPEJ_108_227.depth	102596	457.24
scaffold_PAIajnDLiB1-4-16-3PIAAPEJ_108_121.depth	102286	91.0419
scaffold_PAIajnDLiB1-4-16-3PIAAPEJ_108_123.depth	101909	22.2924
scaffold_PAIajnDLiB1-4-16-3PIAAPEJ_108_19.depth	101903	33.4848
scaffold_PAIajnDLiB1-4-16-3PIAAPEJ_108_192.depth	101293	447.051
scaffold_PAIajnDLiB1-4-16-3PIAAPEJ_108_189.depth	100546	393.051
scaffold_PAIajnDLiB1-4-16-3PIAAPEJ_108_174.depth	100481	24.8525
scaffold_PAIajnDLiB1-4-16-3PIAAPEJ_108_88.depth	100476	32.2199
scaffold_PAIajnDLiB1-4-16-3PIAAPEJ_108_108.depth	99220	30.485
scaffold_PAIajnDLiB1-4-16-3PIAAPEJ_108_242.depth	98817	512.412
scaffold_PAIajnDLiB1-4-16-3PIAAPEJ_108_115.depth	98379	115.044
scaffold_PAIajnDLiB1-4-16-3PIAAPEJ_108_290.depth	97850	1495.66
scaffold_PAIajnDLiB1-4-16-3PIAAPEJ_108_231.depth	97675	761.438
scaffold_PAIajnDLiB1-4-16-3PIAAPEJ_108_136.depth	97606	1003.44
scaffold_PAIajnDLiB1-4-16-3PIAAPEJ_108_85.depth	96772	31.962
scaffold_PAIajnDLiB1-4-16-3PIAAPEJ_108_120.depth	96524	155.487
scaffold_PAIajnDLiB1-4-16-3PIAAPEJ_108_272.depth	95927	32.2282
scaffold_PAIajnDLiB1-4-16-3PIAAPEJ_108_117.depth	95705	238.345
scaffold_PAIajnDLiB1-4-16-3PIAAPEJ_108_124.depth	95596	139.318
scaffold_PAIajnDLiB1-4-16-3PIAAPEJ_108_127.depth	95421	612.771
scaffold_PAIajnDLiB1-4-16-3PIAAPEJ_108_161.depth	95304	37.3246
scaffold_PAIajnDLiB1-4-16-3PIAAPEJ_108_129.depth	95068	78.8105
scaffold_PAIajnDLiB1-4-16-3PIAAPEJ_108_76.depth	95006	26.2205
scaffold_PAIajnDLiB1-4-16-3PIAAPEJ_108_100.depth	94723	229.311
scaffold_PAIajnDLiB1-4-16-3PIAAPEJ_108_279.depth	94262	531.245
scaffold_PAIajnDLiB1-4-16-3PIAAPEJ_108_178.depth	94133	917.196
scaffold_PAIajnDLiB1-4-16-3PIAAPEJ_108_107.depth	94054	31.2087
scaffold_PAIajnDLiB1-4-16-3PIAAPEJ_108_229.depth	93866	196.653
scaffold_PAIajnDLiB1-4-16-3PIAAPEJ_108_83.depth	93649	29.0245
scaffold_PAIajnDLiB1-4-16-3PIAAPEJ_108_282.depth	93446	164.722
scaffold_PAIajnDLiB1-4-16-3PIAAPEJ_108_150.depth	92910	352.686
scaffold_PAIajnDLiB1-4-16-3PIAAPEJ_108_163.depth	92889	28.2871
scaffold_PAIajnDLiB1-4-16-3PIAAPEJ_108_144.depth	92788	59.6692
scaffold_PAIajnDLiB1-4-16-3PIAAPEJ_108_147.depth	92623	27.3259
scaffold_PAIajnDLiB1-4-16-3PIAAPEJ_108_110.depth	92622	42.7518
scaffold_PAIajnDLiB1-4-16-3PIAAPEJ_108_232.depth	92618	403.226
scaffold_PAIajnDLiB1-4-16-3PIAAPEJ_108_15.depth	92322	107.044
scaffold_PAIajnDLiB1-4-16-3PIAAPEJ_108_75.depth	92298	345.802
scaffold_PAIajnDLiB1-4-16-3PIAAPEJ_108_122.depth	92146	38.681
scaffold_PAIajnDLiB1-4-16-3PIAAPEJ_108_116.depth	92037	215.564
scaffold_PAIajnDLiB1-4-16-3PIAAPEJ_108_236.depth	91965	39.9889
scaffold_PAIajnDLiB1-4-16-3PIAAPEJ_109_102.depth	91763	29.5808
scaffold_PAIajnDLiB1-4-16-3PIAAPEJ_108_277.depth	91552	70.5222
scaffold_PAIajnDLiB1-4-16-3PIAAPEJ_108_11.depth	91489	51.0107
scaffold_PAIajnDLiB1-4-16-3PIAAPEJ_108_73.depth	91417	34.9502
scaffold_PAIajnDLiB1-4-16-3PIAAPEJ_108_166.depth	90147	53.7013
scaffold_PAIajnDLiB1-4-16-3PIAAPEJ_108_154.depth	89319	100.363
scaffold_PAIajnDLiB1-4-16-3PIAAPEJ_108_23.depth	89300	818.904
scaffold_PAIajnDLiB1-4-16-3PIAAPEJ_108_18.depth	89292	870.985
scaffold_PAIajnDLiB1-4-16-3PIAAPEJ_108_20.depth	89007	180.006
scaffold_PAIajnDLiB1-4-16-3PIAAPEJ_108_146.depth	88570	1119.57
scaffold_PAIajnDLiB1-4-16-3PIAAPEJ_108_25.depth	88568	137.314
scaffold_PAIajnDLiB1-4-16-3PIAAPEJ_108_24.depth	88391	22.6981
scaffold_PAIajnDLiB1-4-16-3PIAAPEJ_108_222.depth	88037	40.2795
scaffold_PAIajnDLiB1-4-16-3PIAAPEJ_108_78.depth	87971	194.848
scaffold_PAIajnDLiB1-4-16-3PIAAPEJ_108_12.depth	87745	55.9252
scaffold_PAIajnDLiB1-4-16-3PIAAPEJ_108_118.depth	87577	24.2978
scaffold_PAIajnDLiB1-4-16-3PIAAPEJ_108_200.depth	87274	21.4263
scaffold_PAIajnDLiB1-4-16-3PIAAPEJ_108_135.depth	87211	368.273
scaffold_PAIajnDLiB1-4-16-3PIAAPEJ_108_86.depth	86384	54.9279
scaffold_PAIajnDLiB1-4-16-3PIAAPEJ_108_106.depth	85963	35.5648
scaffold_PAIajnDLiB1-4-16-3PIAAPEJ_108_21.depth	85044	219.174
scaffold_PAIajnDLiB1-4-16-3PIAAPEJ_108_130.depth	84944	22.9175
scaffold_PAIajnDLiB1-4-16-3PIAAPEJ_108_212.depth	84514	20.8569
scaffold_PAIajnDLiB1-4-16-3PIAAPEJ_108_153.depth	84274	45.5254
scaffold_PAIajnDLiB1-4-16-3PIAAPEJ_108_112.depth	83762	43.4343
scaffold_PAIajnDLiB1-4-16-3PIAAPEJ_108_213.depth	83562	33.5568
scaffold_PAIajnDLiB1-4-16-3PIAAPEJ_108_71.depth	83286	1010.29
scaffold_PAIajnDLiB1-4-16-3PIAAPEJ_108_93.depth	82934	25.6875
scaffold_PAIajnDLiB1-4-16-3PIAAPEJ_108_176.depth	82628	22.5245
scaffold_PAIajnDLiB1-4-16-3PIAAPEJ_108_274.depth	82605	457.576
scaffold_PAIajnDLiB1-4-16-3PIAAPEJ_108_228.depth	81906	541.766
scaffold_PAIajnDLiB1-4-16-3PIAAPEJ_108_172.depth	81084	22.9323
scaffold_PAIajnDLiB1-4-16-3PIAAPEJ_108_199.depth	80403	1737.87
scaffold_PAIajnDLiB1-4-16-3PIAAPEJ_108_190.depth	80255	50.568
scaffold_PAIajnDLiB1-4-16-3PIAAPEJ_108_126.depth	79688	463.727
scaffold_PAIajnDLiB1-4-16-3PIAAPEJ_108_131.depth	79451	21.3387
scaffold_PAIajnDLiB1-4-16-3PIAAPEJ_108_258.depth	78300	2574.76
scaffold_PAIajnDLiB1-4-16-3PIAAPEJ_108_233.depth	77381	841.647
scaffold_PAIajnDLiB1-4-16-3PIAAPEJ_108_169.depth	74319	664.531
scaffold_PAIajnDLiB1-4-16-3PIAAPEJ_108_220.depth	70237	816.583
scaffold_PAIajnDLiB1-4-16-3PIAAPEJ_108_239.depth	69834	23.4667
scaffold_PAIajnDLiB1-4-16-3PIAAPEJ_108_251.depth	68662	2956.28
scaffold_PAIajnDLiB1-4-16-3PIAAPEJ_108_158.depth	67342	95.9306
scaffold_PAIajnDLiB1-4-16-3PIAAPEJ_108_14.depth	66804	169.888
scaffold_PAIajnDLiB1-4-16-3PIAAPEJ_108_139.depth	64276	32.4404
scaffold_PAIajnDLiB1-4-16-3PIAAPEJ_108_207.depth	63042	39.7853
scaffold_PAIajnDLiB1-4-16-3PIAAPEJ_108_151.depth	61697	2929.27
scaffold_PAIajnDLiB1-4-16-3PIAAPEJ_108_215.depth	59273	3645.32
scaffold_PAIajnDLiB1-4-16-3PIAAPEJ_108_259.depth	59151	2425.23
scaffold_PAIajnDLiB1-4-16-3PIAAPEJ_108_89.depth	56495	756.341
scaffold_PAIajnDLiB1-4-16-3PIAAPEJ_109_105.depth	56001	486.982
scaffold_PAIajnDLiB1-4-16-3PIAAPEJ_108_113.depth	55546	37.4552
scaffold_PAIajnDLiB1-4-16-3PIAAPEJ_108_265.depth	50440	511.767
scaffold_PAIajnDLiB1-4-16-3PIAAPEJ_109_104.depth	50198	23.4659
scaffold_PAIajnDLiB1-4-16-3PIAAPEJ_108_111.depth	49864	2119.42
scaffold_PAIajnDLiB1-4-16-3PIAAPEJ_108_8.depth	49065	2005.73
scaffold_PAIajnDLiB1-4-16-3PIAAPEJ_108_291.depth	44878	2377.89
scaffold_PAIajnDLiB1-4-16-3PIAAPEJ_108_28.depth	44854	2132.8
scaffold_PAIajnDLiB1-4-16-3PIAAPEJ_108_179.depth	42817	27.9841
scaffold_PAIajnDLiB1-4-16-3PIAAPEJ_108_105.depth	42623	38.2432
scaffold_PAIajnDLiB1-4-16-3PIAAPEJ_108_149.depth	41778	16.4073
scaffold_PAIajnDLiB1-4-16-3PIAAPEJ_108_234.depth	39281	277.136
scaffold_PAIajnDLiB1-4-16-3PIAAPEJ_108_252.depth	39113	21.8974
scaffold_PAIajnDLiB1-4-16-3PIAAPEJ_108_133.depth	38816	251.976
scaffold_PAIajnDLiB1-4-16-3PIAAPEJ_108_90.depth	37872	88.7089
scaffold_PAIajnDLiB1-4-16-3PIAAPEJ_108_256.depth	37668	943.082
scaffold_PAIajnDLiB1-4-16-3PIAAPEJ_108_173.depth	36477	2398.84
scaffold_PAIajnDLiB1-4-16-3PIAAPEJ_108_210.depth	35813	265.474
scaffold_PAIajnDLiB1-4-16-3PIAAPEJ_108_155.depth	35434	915.418
scaffold_PAIajnDLiB1-4-16-3PIAAPEJ_108_27.depth	35201	46.0493
scaffold_PAIajnDLiB1-4-16-3PIAAPEJ_108_70.depth	34208	41.0775
scaffold_PAIajnDLiB1-4-16-3PIAAPEJ_108_74.depth	34051	166.151
scaffold_PAIajnDLiB1-4-16-3PIAAPEJ_108_167.depth	27256	669.569
scaffold_PAIajnDLiB1-4-16-3PIAAPEJ_108_171.depth	25846	19.226
scaffold_PAIajnDLiB1-4-16-3PIAAPEJ_108_125.depth	25509	3007.86
scaffold_PAIajnDLiB1-4-16-3PIAAPEJ_108_137.depth	24403	5959.67
scaffold_PAIajnDLiB1-4-16-3PIAAPEJ_108_226.depth	21864	22.5165
scaffold_PAIajnDLiB1-4-16-3PIAAPEJ_108_97.depth	19085	27.3796
scaffold_PAIajnDLiB1-4-16-3PIAAPEJ_108_1.depth	15748	329.708
scaffold_PAIajnDLiB1-4-16-3PIAAPEJ_108_96.depth	11747	399.404
Average	93335.4	405.437

## Sheet: unphased
Supplemental_Table_S10 the depth of coverage on Phased and Unphased BACs
BAC ID	BAC length	the average depth of coverage
scaffold_PAIajnDLiB130-159PIAAPEJ_138_106.depth	156469	1372.6
scaffold_PAIajnDLiB130-159PIAAPEJ_137_190.depth	121130	1607.05
scaffold_PAIajnDLIB100-129PIAAPEJ_31_87.depth	121030	2675.32
scaffold_PAIajnDLIB100-129PIAAPEJ_28_293.depth	120582	2685.53
scaffold_PAIajnDLIB100-129PIAAPEJ_25_221.depth	118439	2652.5
scaffold_PAIajnDLIB100-129PIAAPEJ_27_230.depth	115026	2704.08
scaffold_PAIajnDLiB130-159PIAAPEJ_135_131.depth	114234	24.5762
scaffold_PAIajnDLIB100-129PIAAPEJ_30_198.depth	110482	2636.34
scaffold_PAIajnDLIB100-129PIAAPEJ_26_197.depth	106725	2813.57
scaffold_PAIajnDLIB100-129PIAAPEJ_23_222.depth	105959	2795.99
scaffold_PAIajnDLiB130-159PIAAPEJ_135_34.depth	103915	405.26
scaffold_PAIajnDLIB100-129PIAAPEJ_31_218.depth	101974	2875.42
scaffold_PAIajnDLiB130-159PIAAPEJ_137_199.depth	100163	22.7194
scaffold_PAIajnDLiB130-159PIAAPEJ_135_252.depth	99120	2898.17
scaffold_PAIajnDLiB130-159PIAAPEJ_137_181.depth	96325	2919.68
scaffold_PAIajnDLiB130-159PIAAPEJ_137_294.depth	95714	2310.73
scaffold_PAIajnDLiB130-159PIAAPEJ_137_72.depth	95130	2714.21
scaffold_PAIajnDLIB100-129PIAAPEJ_30_113.depth	95097	2778.93
scaffold_PAIajnDLiB130-159PIAAPEJ_135_202.depth	94952	33.868
scaffold_PAIajnDLiB130-159PIAAPEJ_135_248.depth	94419	149.368
scaffold_PAIajnDLiB130-159PIAAPEJ_135_217.depth	93666	1458.37
scaffold_PAIajnDLiB130-159PIAAPEJ_136_223.depth	93550	2561.31
scaffold_PAIajnDLiB130-159PIAAPEJ_138_126.depth	93536	2281.71
scaffold_PAIajnDLiB130-159PIAAPEJ_136_226.depth	93061	560.654
scaffold_PAIajnDLiB130-159PIAAPEJ_138_223.depth	92584	36.5165
scaffold_PAIajnDLIB100-129PIAAPEJ_24_109.depth	92344	2671.57
scaffold_PAIajnDLiB130-159PIAAPEJ_136_225.depth	92276	2842.15
scaffold_PAIajnDLiB130-159PIAAPEJ_137_288.depth	92247	567.786
scaffold_PAIajnDLiB130-159PIAAPEJ_138_227.depth	91696	65.7261
scaffold_PAIajnDLiB130-159PIAAPEJ_135_120.depth	91119	2940.96
scaffold_PAIajnDLiB130-159PIAAPEJ_137_296.depth	91085	2692.49
scaffold_PAIajnDLiB130-159PIAAPEJ_136_297.depth	90165	2779.58
scaffold_PAIajnDLIB100-129PIAAPEJ_25_226.depth	89942	1127.42
scaffold_PAIajnDLIB100-129PIAAPEJ_26_36.depth	89475	1053.4
scaffold_PAIajnDLIB100-129PIAAPEJ_26_204.depth	89275	2044.58
scaffold_PAIajnDLIB100-129PIAAPEJ_26_299.depth	89041	2483.64
scaffold_PAIajnDLIB100-129PIAAPEJ_31_99.depth	89041	2913.79
scaffold_PAIajnDLIB100-129PIAAPEJ_31_123.depth	88956	2761.71
scaffold_PAIajnDLIB100-129PIAAPEJ_29_53.depth	88722	2584.13
scaffold_PAIajnDLIB100-129PIAAPEJ_28_146.depth	87314	2700.23
scaffold_PAIajnDLIB100-129PIAAPEJ_23_184.depth	87242	1326.4
scaffold_PAIajnDLIB100-129PIAAPEJ_24_114.depth	86813	1574.22
scaffold_PAIajnDLIB100-129PIAAPEJ_28_153.depth	86548	539.53
scaffold_PAIajnDLiB130-159PIAAPEJ_137_51.depth	86129	1190.97
scaffold_PAIajnDLIB100-129PIAAPEJ_31_216.depth	86102	1602.29
scaffold_PAIajnDLIB100-129PIAAPEJ_22_251.depth	86096	1367.47
scaffold_PAIajnDLiB130-159PIAAPEJ_138_215.depth	85917	2696.03
scaffold_PAIajnDLIB100-129PIAAPEJ_30_160.depth	85816	1035.72
scaffold_PAIajnDLiB130-159PIAAPEJ_135_183.depth	85470	2364.28
scaffold_PAIajnDLIB100-129PIAAPEJ_22_35.depth	85279	2965.07
scaffold_PAIajnDLiB130-159PIAAPEJ_135_92.depth	84500	2997.26
scaffold_PAIajnDLiB130-159PIAAPEJ_138_276.depth	84491	630.111
scaffold_PAIajnDLIB100-129PIAAPEJ_22_111.depth	84207	1077.42
scaffold_PAIajnDLIB100-129PIAAPEJ_22_91.depth	83978	1275.6
scaffold_PAIajnDLiB130-159PIAAPEJ_137_112.depth	83343	1569.83
scaffold_PAIajnDLiB130-159PIAAPEJ_137_58.depth	82936	1639.86
scaffold_PAIajnDLIB100-129PIAAPEJ_31_133.depth	82641	1235.4
scaffold_PAIajnDLIB100-129PIAAPEJ_29_222.depth	82525	2911.4
scaffold_PAIajnDLIB100-129PIAAPEJ_24_196.depth	81659	2959.53
scaffold_PAIajnDLIB100-129PIAAPEJ_29_171.depth	81575	535.741
scaffold_PAIajnDLIB100-129PIAAPEJ_30_197.depth	81452	2939.05
scaffold_PAIajnDLiB130-159PIAAPEJ_136_257.depth	80395	487.382
scaffold_PAIajnDLIB100-129PIAAPEJ_24_151.depth	79926	3023.63
scaffold_PAIajnDLIB100-129PIAAPEJ_31_271.depth	79736	1195.99
scaffold_PAIajnDLIB100-129PIAAPEJ_26_86.depth	79676	1875.3
scaffold_PAIajnDLiB130-159PIAAPEJ_136_249.depth	79332	2138.13
scaffold_PAIajnDLIB100-129PIAAPEJ_31_42.depth	79301	2480.48
scaffold_PAIajnDLiB130-159PIAAPEJ_138_280.depth	78295	2200.16
scaffold_PAIajnDLIB100-129PIAAPEJ_25_276.depth	77544	1783.07
scaffold_PAIajnDLIB100-129PIAAPEJ_27_235.depth	77336	2166.53
scaffold_PAIajnDLiB130-159PIAAPEJ_135_17.depth	76683	2179.24
scaffold_PAIajnDLiB130-159PIAAPEJ_135_235.depth	76244	3047.77
scaffold_PAIajnDLIB100-129PIAAPEJ_22_40.depth	76099	1323.51
scaffold_PAIajnDLIB100-129PIAAPEJ_23_228.depth	76056	2001.86
scaffold_PAIajnDLIB100-129PIAAPEJ_23_142.depth	75130	341.45
scaffold_PAIajnDLiB130-159PIAAPEJ_136_280.depth	73281	2748.72
scaffold_PAIajnDLIB100-129PIAAPEJ_26_297.depth	72965	3099.49
scaffold_PAIajnDLIB100-129PIAAPEJ_30_24.depth	72401	1053.18
scaffold_PAIajnDLIB100-129PIAAPEJ_31_222.depth	72064	2465.07
scaffold_PAIajnDLiB130-159PIAAPEJ_136_248.depth	71749	3114.91
scaffold_PAIajnDLIB100-129PIAAPEJ_25_237.depth	70980	1873.38
scaffold_PAIajnDLIB100-129PIAAPEJ_30_35.depth	70785	12.7069
scaffold_PAIajnDLIB100-129PIAAPEJ_31_225.depth	70557	2261.19
scaffold_PAIajnDLiB130-159PIAAPEJ_136_204.depth	70302	2028.86
scaffold_PAIajnDLIB100-129PIAAPEJ_25_122.depth	70136	3104.2
scaffold_PAIajnDLiB130-159PIAAPEJ_138_265.depth	68733	3187.78
scaffold_PAIajnDLIB100-129PIAAPEJ_28_150.depth	67993	2808.18
scaffold_PAIajnDLIB100-129PIAAPEJ_28_158.depth	67924	1914.51
scaffold_PAIajnDLIB100-129PIAAPEJ_22_216.depth	67157	183.237
scaffold_PAIajnDLiB130-159PIAAPEJ_138_25.depth	67104	42.9502
scaffold_PAIajnDLiB130-159PIAAPEJ_135_173.depth	67071	36.581
scaffold_PAIajnDLiB130-159PIAAPEJ_136_186.depth	66856	57.126
scaffold_PAIajnDLiB130-159PIAAPEJ_137_223.depth	64909	2118.66
scaffold_PAIajnDLIB100-129PIAAPEJ_26_37.depth	64839	1708.2
scaffold_PAIajnDLIB100-129PIAAPEJ_26_87.depth	64533	1982.89
scaffold_PAIajnDLIB100-129PIAAPEJ_30_109.depth	63353	2160.65
scaffold_PAIajnDLiB130-159PIAAPEJ_136_86.depth	63000	2156.48
scaffold_PAIajnDLiB130-159PIAAPEJ_135_250.depth	60743	2033.8
scaffold_PAIajnDLIB100-129PIAAPEJ_22_44.depth	57204	1277.06
scaffold_PAIajnDLiB130-159PIAAPEJ_138_20.depth	53268	114.487
scaffold_PAIajnDLiB130-159PIAAPEJ_137_27.depth	53148	681.015
scaffold_PAIajnDLiB130-159PIAAPEJ_135_1.depth	52744	2154.04
scaffold_PAIajnDLIB100-129PIAAPEJ_31_221.depth	52705	370.014
scaffold_PAIajnDLIB100-129PIAAPEJ_22_205.depth	52556	2198.31
scaffold_PAIajnDLIB100-129PIAAPEJ_25_56.depth	48903	1046.56
scaffold_PAIajnDLIB100-129PIAAPEJ_25_184.depth	46613	2111.24
scaffold_PAIajnDLiB130-159PIAAPEJ_135_155.depth	46213	3235.18
scaffold_PAIajnDLiB130-159PIAAPEJ_135_184.depth	42865	22.0857
scaffold_PAIajnDLiB130-159PIAAPEJ_135_192.depth	41851	2995.33
scaffold_PAIajnDLIB100-129PIAAPEJ_29_22.depth	41341	48.2271
scaffold_PAIajnDLiB130-159PIAAPEJ_137_214.depth	41329	1620.32
scaffold_PAIajnDLIB100-129PIAAPEJ_25_185.depth	40340	674.995
scaffold_PAIajnDLiB130-159PIAAPEJ_137_189.depth	39756	2979.62
scaffold_PAIajnDLIB100-129PIAAPEJ_23_6.depth	36106	2067.94
scaffold_PAIajnDLIB100-129PIAAPEJ_24_81.depth	34280	487.489
scaffold_PAIajnDLIB100-129PIAAPEJ_31_16.depth	33563	12.2272
scaffold_PAIajnDLiB130-159PIAAPEJ_135_276.depth	32701	543.185
scaffold_PAIajnDLiB130-159PIAAPEJ_136_239.depth	29658	3037.11
scaffold_PAIajnDLiB130-159PIAAPEJ_137_29.depth	27607	365.155
scaffold_PAIajnDLIB100-129PIAAPEJ_30_81.depth	25463	1355.53
scaffold_PAIajnDLiB130-159PIAAPEJ_135_49.depth	24999	2200.5
scaffold_PAIajnDLiB130-159PIAAPEJ_138_271.depth	24393	2182
scaffold_PAIajnDLiB130-159PIAAPEJ_137_75.depth	23762	62.6776
scaffold_PAIajnDLiB130-159PIAAPEJ_138_267.depth	22337	3769.21
scaffold_PAIajnDLIB100-129PIAAPEJ_27_143.depth	22287	5440.22
scaffold_PAIajnDLIB100-129PIAAPEJ_31_94.depth	20126	8.20402
scaffold_PAIajnDLiB130-159PIAAPEJ_138_220.depth	19927	85.6238
scaffold_PAIajnDLiB130-159PIAAPEJ_138_263.depth	19290	4982.04
scaffold_PAIajnDLiB130-159PIAAPEJ_135_174.depth	18655	4233.31
scaffold_PAIajnDLIB100-129PIAAPEJ_30_103.depth	18193	4788.93
scaffold_PAIajnDLiB130-159PIAAPEJ_138_150.depth	17563	5284.77
scaffold_PAIajnDLIB100-129PIAAPEJ_24_153.depth	17527	6345.05
scaffold_PAIajnDLiB130-159PIAAPEJ_135_40.depth	17197	73.7857
scaffold_PAIajnDLIB100-129PIAAPEJ_28_202.depth	17102	5839.54
scaffold_PAIajnDLIB100-129PIAAPEJ_31_25.depth	16954	90.9475
scaffold_PAIajnDLiB130-159PIAAPEJ_135_191.depth	16817	318.358
scaffold_PAIajnDLIB100-129PIAAPEJ_28_71.depth	16637	5899.97
scaffold_PAIajnDLiB130-159PIAAPEJ_136_222.depth	16530	1964.52
scaffold_PAIajnDLIB100-129PIAAPEJ_27_218.depth	16436	4792.15
scaffold_PAIajnDLiB130-159PIAAPEJ_138_28.depth	16263	5749.25
scaffold_PAIajnDLIB100-129PIAAPEJ_28_300.depth	15771	261.743
scaffold_PAIajnDLiB130-159PIAAPEJ_136_131.depth	15708	6673.46
scaffold_PAIajnDLiB130-159PIAAPEJ_136_150.depth	15484	6.52677
scaffold_PAIajnDLiB130-159PIAAPEJ_135_186.depth	15422	404.969
scaffold_PAIajnDLIB100-129PIAAPEJ_24_38.depth	14457	3883.47
scaffold_PAIajnDLiB130-159PIAAPEJ_137_21.depth	13779	814.6
scaffold_PAIajnDLiB130-159PIAAPEJ_136_242.depth	13277	17.7471
scaffold_PAIajnDLIB100-129PIAAPEJ_23_139.depth	13013	4.79042
scaffold_PAIajnDLIB100-129PIAAPEJ_22_104.depth	12798	1554.31
scaffold_PAIajnDLIB100-129PIAAPEJ_26_81.depth	12595	720.163
scaffold_PAIajnDLIB100-129PIAAPEJ_28_70.depth	12566	4305.77
scaffold_PAIajnDLIB100-129PIAAPEJ_29_54.depth	12497	1341.87
scaffold_PAIajnDLiB130-159PIAAPEJ_136_258.depth	12372	3.50369
scaffold_PAIajnDLIB100-129PIAAPEJ_28_253.depth	12039	585.724
scaffold_PAIajnDLiB130-159PIAAPEJ_135_47.depth	11742	35.1495
scaffold_PAIajnDLIB100-129PIAAPEJ_29_183.depth	11528	5.71924
scaffold_PAIajnDLIB100-129PIAAPEJ_26_246.depth	11523	208.491
scaffold_PAIajnDLIB100-129PIAAPEJ_25_63.depth	11296	16.68
scaffold_PAIajnDLIB100-129PIAAPEJ_25_123.depth	11111	3.43915
scaffold_PAIajnDLIB100-129PIAAPEJ_25_127.depth	10871	1.24113
scaffold_PAIajnDLIB100-129PIAAPEJ_29_218.depth	10842	469.376
scaffold_PAIajnDLIB100-129PIAAPEJ_23_53.depth	10105	17.053
scaffold_PAIajnDLIB100-129PIAAPEJ_29_125.depth	9855	8.12582
scaffold_PAIajnDLIB100-129PIAAPEJ_26_101.depth	9804	5.85683
scaffold_PAIajnDLIB100-129PIAAPEJ_22_41.depth	9551	11.9108
scaffold_PAIajnDLIB100-129PIAAPEJ_31_41.depth	9538	1020.88
scaffold_PAIajnDLIB100-129PIAAPEJ_26_100.depth	9467	7.56844
scaffold_PAIajnDLIB100-129PIAAPEJ_29_64.depth	9436	6.18632
scaffold_PAIajnDLIB100-129PIAAPEJ_31_132.depth	9337	464.954
scaffold_PAIajnDLiB130-159PIAAPEJ_135_88.depth	9266	98.1837
scaffold_PAIajnDLIB100-129PIAAPEJ_24_44.depth	8940	11.3553
scaffold_PAIajnDLIB100-129PIAAPEJ_25_6.depth	8698	37.7847
scaffold_PAIajnDLiB130-159PIAAPEJ_135_271.depth	8569	2010.61
scaffold_PAIajnDLIB100-129PIAAPEJ_28_78.depth	8115	23.3909
scaffold_PAIajnDLiB130-159PIAAPEJ_136_67.depth	8082	213.751
scaffold_PAIajnDLIB100-129PIAAPEJ_23_22.depth	8066	240.769
scaffold_PAIajnDLIB100-129PIAAPEJ_27_138.depth	7897	598.677
scaffold_PAIajnDLiB130-159PIAAPEJ_137_160.depth	7816	344.665
scaffold_PAIajnDLIB100-129PIAAPEJ_31_9.depth	7628	11.5942
scaffold_PAIajnDLIB100-129PIAAPEJ_29_66.depth	7501	30.109
scaffold_PAIajnDLIB100-129PIAAPEJ_29_132.depth	7048	13.7037
scaffold_PAIajnDLIB100-129PIAAPEJ_26_150.depth	6747	3.76471
scaffold_PAIajnDLIB100-129PIAAPEJ_22_39.depth	6159	478.701
scaffold_PAIajnDLiB130-159PIAAPEJ_136_6.depth	5203	3.01783
scaffold_PAIajnDLIB100-129PIAAPEJ_27_18.depth	4157	239.038
scaffold_PAIajnDLIB100-129PIAAPEJ_22_113.depth	3209	253.88
scaffold_PAIajnDLIB100-129PIAAPEJ_25_58.depth	1933	14.2336
Average	54587.8	1625.83
